# Supplementary material for: Transcriptome Analysis Reveals that p53 and β-Catenin Alterations Occur in a Group of Aggressive Adrenocortical Cancers
Source: Oxford University Press journal article supplement (doi:10.1158/0008-5472.can-10-2014), 2010-10-19
Supplement: 00085472can102014-sup-stab_2.xls [file 00085472can102014-sup-stab_2.xls]

## Sheet: TP53 and CTNNB1 target genes
Riley T, Sontag E, Chen P, Levine A. Transcriptional control of human p53-regulated genes. Nat Rev Mol Cell Biol 2008; 9: 402-12.			The Wnt homepage : http://www.stanford.edu/~rnusse/pathways/targets.html
TP53 positive target genes			CTNNB1 positive target genes
ACTA2			AXIN2
AIFM2			BHLHE40
APAF1			BIRC5
ARID3A			BMP4
ATF3			BTRC
BAI1			CCND1
BAX			CD44
BBC3			CDX1
BCL2L14			CDX4
BCL6			CLDN1
BDKRB2			CTLA4
BID			CYR61
BNIP3L			DKK1
BTG2			DLL1
C12orf5			EDA
C13orf15			EDN1
CASP1			EFNB1
CASP10			EGFR
CASP6			EN1
CAV1			ENPP2
CCNG1			FGF18
CCNK			FGF20
CD82			FGF4
CDKN1A			FGF9
CHMP4C			FN1
COL18A1			FOSL1
CTSD			FOXN1
CX3CL1			FST
DDB2			FZD7
DDIT4			GAST
DDR1			GCG
DKK1			GJA1
DUSP1			GLUL
DUSP5			GREM1
EDN2			ID2
EEF1A1			IGF1
EGFR			IGF2
EPHA2			IL6
FANCC			IL8
FAS			IRX3
FDXR			ISL1
GADD45A			ISLR
GDF15			JAG1
GML			JUN
GPX1			KLF5
HGF			L1CAM
HIC1			LEF1
HRAS			LGR5
HTT			MET
IGFBP3			MITF
IRF5			MMP2
KRT8			MMP26
LIF			MMP3
LRDD			MMP7
MDM2			MMP9
MET			MYC
MLH1			MYCBP
MMP2			MYCN
MSH2			NANOG
NDRG1			NEUROG1
NLRC4			NKD1
P2RX6			NLK
PCBP4			NOS2
PCNA			NRCAM
PERP			OAT
PLAGL1			OVOL1
PLK3			PITX2
PML			PLAUR
PMS2			POU5F1
PPM1J			PPARD
PRDM1			PTGS2
PRKAB1			PTTG1
PTEN			RARG
PYCARD			RET
RABGGTA			RHOU
RB1			RUNX2
RFWD2			SALL4
RNF144B			SFRP2
RPS27L			SLC1A2
RRM2B			SNAI1
S100A2			SOX2
SCN3B			SOX9
SERPINB5			SP5
SERPINE1			STRA6
SESN1			T
SFN			TCF4
SH2D1A			TCF7
STEAP3			TIAM1
TAP1			TNFRSF19
TGFA			TNFSF9
TNFRSF10A			TWIST1
TNFRSF10B			VCAN
TNFRSF10C			VEGFA
TNFRSF10D			VEGFC
TP53			WISP1
TP53AIP1			WISP2
TP53I3			WNT1
TP53INP1
TP63
TP73
TRIAP1
TRIM22
TSC2
TYRP1
VCAN
VDR
