# Supplementary material for: Transcriptome Analysis Reveals that p53 and β-Catenin Alterations Occur in a Group of Aggressive Adrenocortical Cancers
Source: Oxford University Press journal article supplement (doi:10.1158/0008-5472.can-10-2014), 2010-10-19
Supplement: 00085472can102014-sup-stable_1.xls [file 00085472can102014-sup-stable_1.xls]

## Sheet: Feuil1
Tumors #	group	TP53 mutation	p53 domain mutated	Abnormal TP53 IHC	CTNNB1 mutation	β-catenin region mutated	Abnormal CTNNB1 IHC
1	C1A	p.L188WfsX2	DNA binding	no	no		no
2	C1A	p.E346X	Tetramerisation/NES	no	no		no
3	C1A	p.C176F	DNA binding	Yes	no		no
4	C1A	p.R342P	Tetramerisation/NES	Yes	no		no
5	C1A	p.A129del	DNA binding	Yes	no		no
6	C1A	p.R283C	DNA binding	Yes	no		no
7	C1A	p.E343X	Tetramerisation/NES	Yes	no		no
8	C1A	p.R342P	Tetramerisation/NES	Yes	no		no
9	C1A	p.K132N	DNA binding	Yes	p.A5_A80del	proteasomal degradation	Yes
10	C1A	no		Yes	p.S45F	proteasomal degradation	Yes
11	C1A	no		no	p.S45F	proteasomal degradation	no
12	C1A	no		no	p.T41A	proteasomal degradation	Yes
13	C1A	no		no	p.S45F	proteasomal degradation	Yes
14	C1A	no		no	p.I35T	proteasomal degradation	Yes
15	C1A	no		no	p.S45F	proteasomal degradation	Yes
16	C1A	no		no	p.S45del	proteasomal degradation	Yes
17	C1A	no		Yes	no		Yes
18	C1A	no		Yes	no		Yes
19	C1A	no		Yes	no		Yes
20	C1A	no		no	no		Yes
21	C1A	no		no	no		Yes
22	C1A	no		no	no		no
23	C1A	no		no	no		no
24	C1A	no		no	no		no
25	C1A	no		no	no		no
26	C1A	no		no	no		no
27	C1A	no		no	no		no
28	C1A	no		no	no		no
29	C1A	no		no	no		no
30	C1A	no		no	no		no
31	C1A	no		na	no		na
32	C1B	no		no	no		no
33	C1B	no		no	no		no
34	C1B	no		no	no		no
35	C1B	no		no	no		no
36	C1B	no		no	no		no
37	C1B	no		no	no		no
38	C1B	no		no	no		no
39	C1B	no		no	no		no
40	C1B	no		no	no		no
41	C1B	no		no	no		no
42	C1B	no		no	no		no
43	C1B	no		no	no		no
44	C1B	no		no	no		no
45	C1B	no		no	no		no
46	C1B	no		no	no		no
47	C1B	no		no	no		no
48	C1B	no		Yes	no		no
49	C1B	no		Yes	no		no
50	C1B	no		na	no		na
51	C1B	no		na	no		na
